# Supplementary material
Source: PubMed Central journal article supplement (PMC2453783)
Supplement: NIHMS55906-supplement-1.pdf [file NIHMS55906-supplement-1.pdf]

Initial part of family W05-549

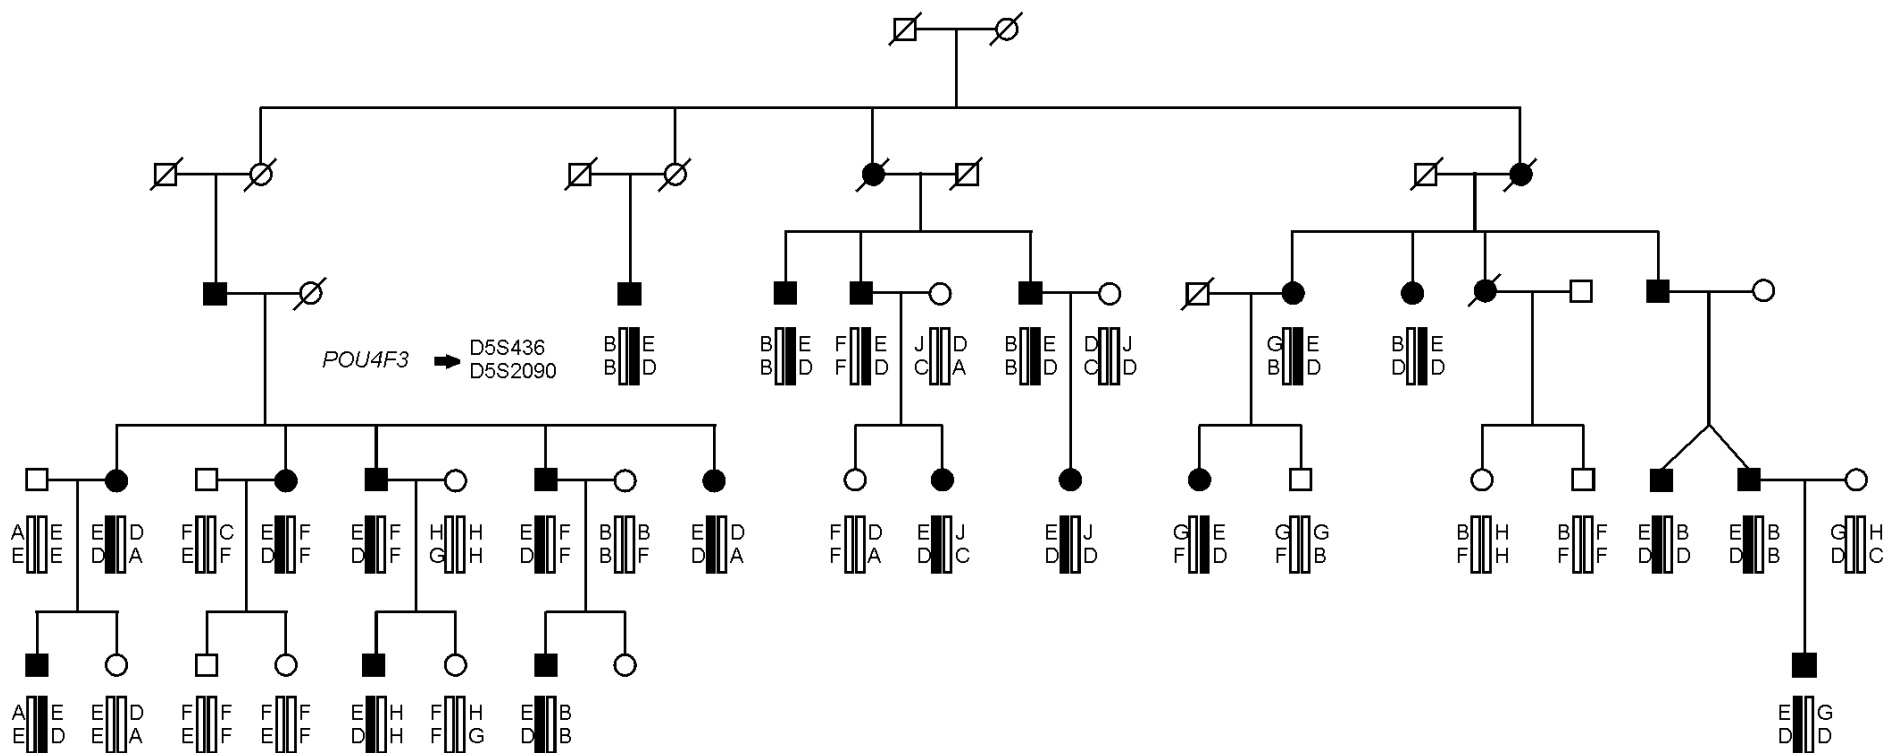

Supplementary Figure S1

Pedigree and haplotype analysis for the part of family W05-549 for which linkage analysis was performed. The disease haplotype is indicated by a black bar. The *POU4F3* gene is located between the markers D5S436 and D5S2090.

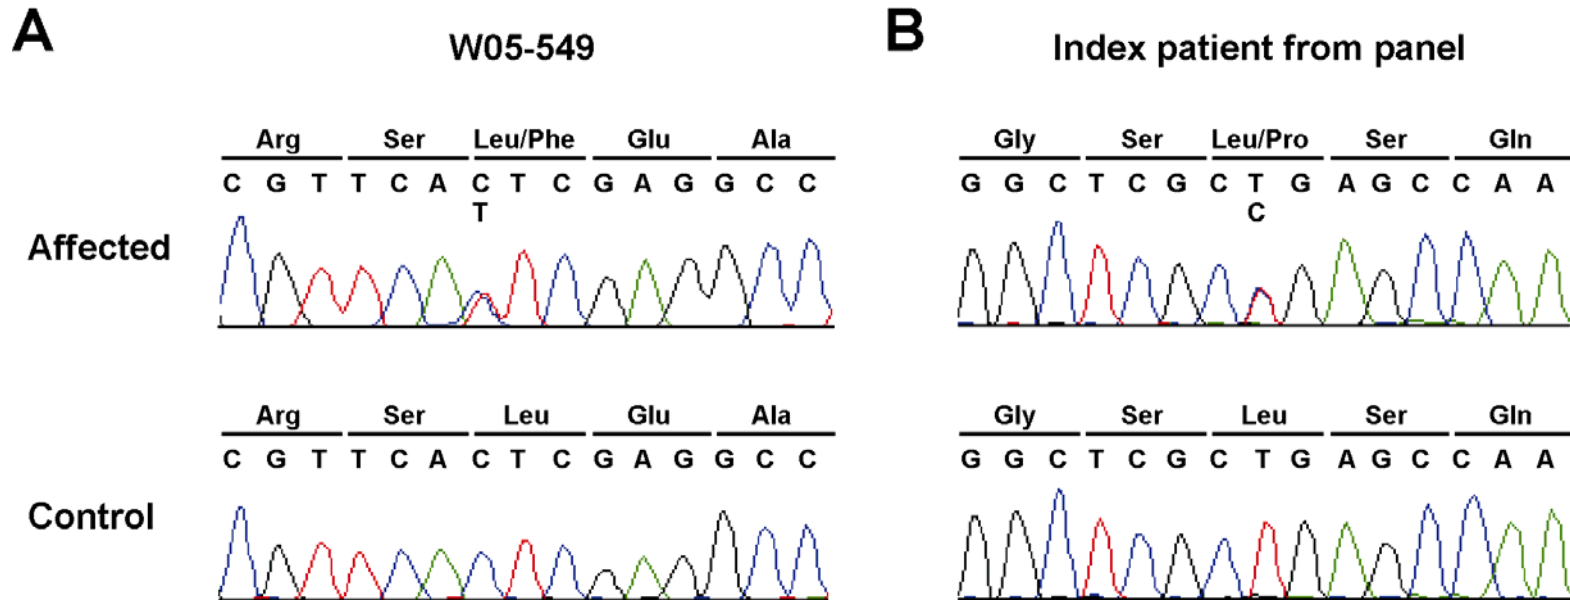**Supplementary Figure S2**

**A)** Partial sequence of the *POU4F3* gene of an affected individual of family W05-549, carrying the heterozygous nucleotide substitution (c.865C>T), and of a normal-hearing family member. The encoded amino acids are indicated above the sequence.

**B)** Partial sequence of the *POU4F3* gene of one of the index patients from a patient panel, carrying a heterozygous nucleotide substitution (c.668T>C) and of a control individual. The predicted amino acid substitution in the affected individual (p.L223P) and the surrounding amino acids are indicated above the sequence.
